# Supplementary material for: Differential TAM receptor–ligand–phospholipid interactions delimit differential TAM bioactivities
Source: eLife journal article supplement (doi:10.7554/elife.03385), 2014-09-29

$\alpha$ -Tyro3/Axl Hoescht

ECD<sub>TIgI</sub>TK<sub>A</sub>

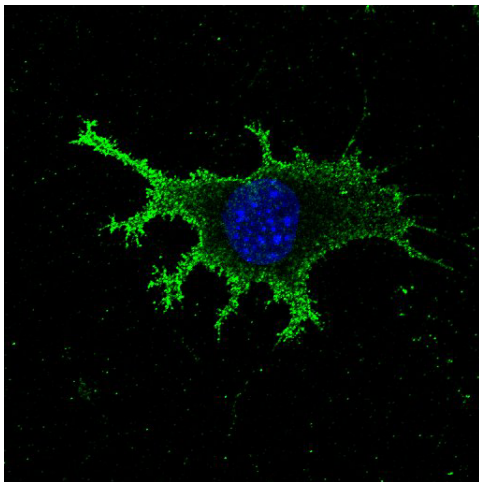

ECD<sub>TIgI/II</sub>TK<sub>A</sub>

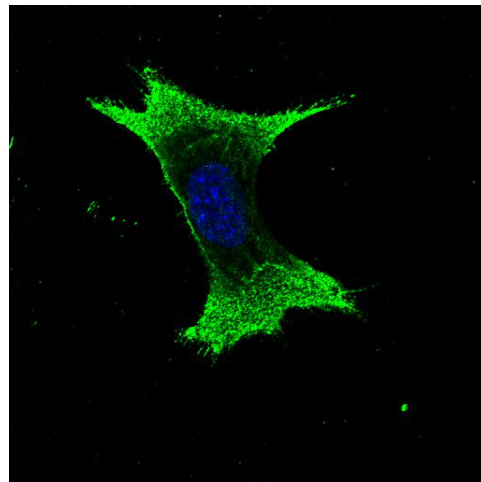

ECD<sub>T</sub>TK<sub>A</sub>

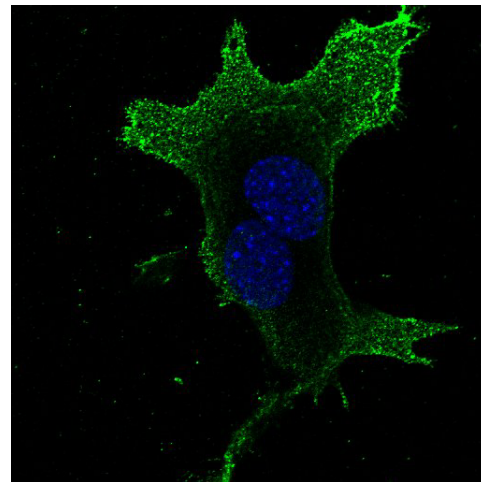

Tyro3

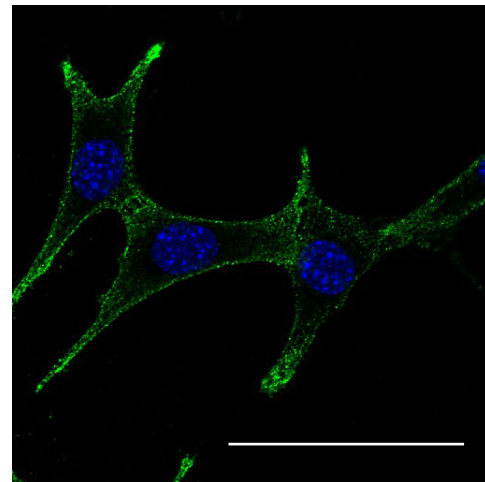

Supplement: supp [file elife_poa_e03385_Figure_6_figure_supplement_1.pdf › elife_poa_e03385_Figure_6_figure_supplement_1.pdf]
