# Supplementary figures and images for: Differential TAM receptor–ligand–phospholipid interactions delimit differential TAM bioactivities
Source: eLife journal article supplement (doi:10.7554/elife.03385), 2014-09-29

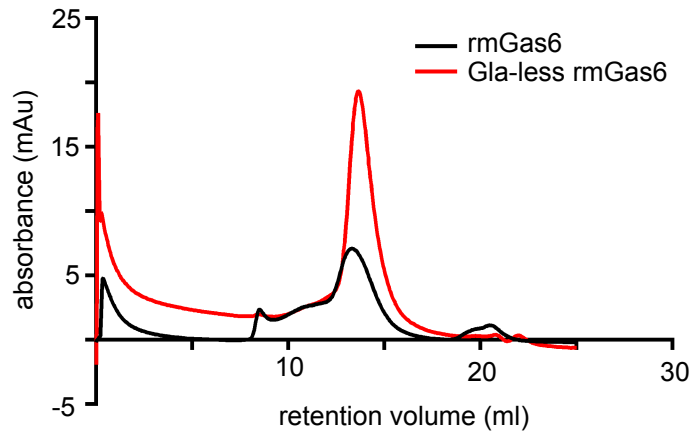

Supplement: supp [file elife_poa_e03385_Figure_1_figure_supplement_1.pdf › elife_poa_e03385_Figure_1_figure_supplement_1.pdf]

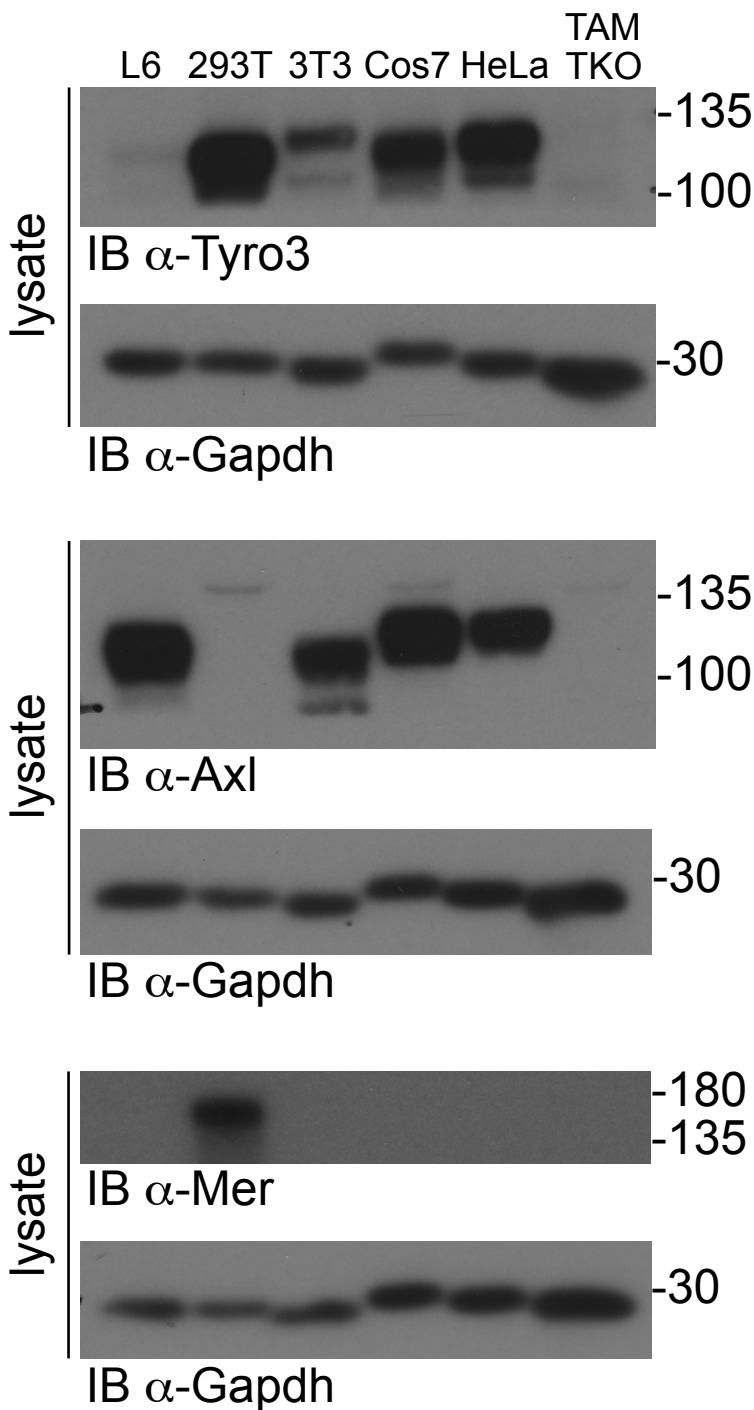

Supplement: supp [file elife_poa_e03385_Figure_1_figure_supplement_2.pdf › elife_poa_e03385_Figure_1_figure_supplement_2.pdf]

# Lew\_Figure 2-supplement 1

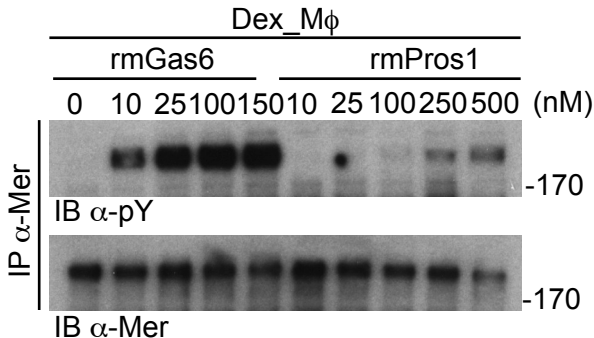

Supplement: supp [file elife_poa_e03385_Figure_2_figure_supplement_1.pdf › elife_poa_e03385_Figure_2_figure_supplement_1.pdf]

A

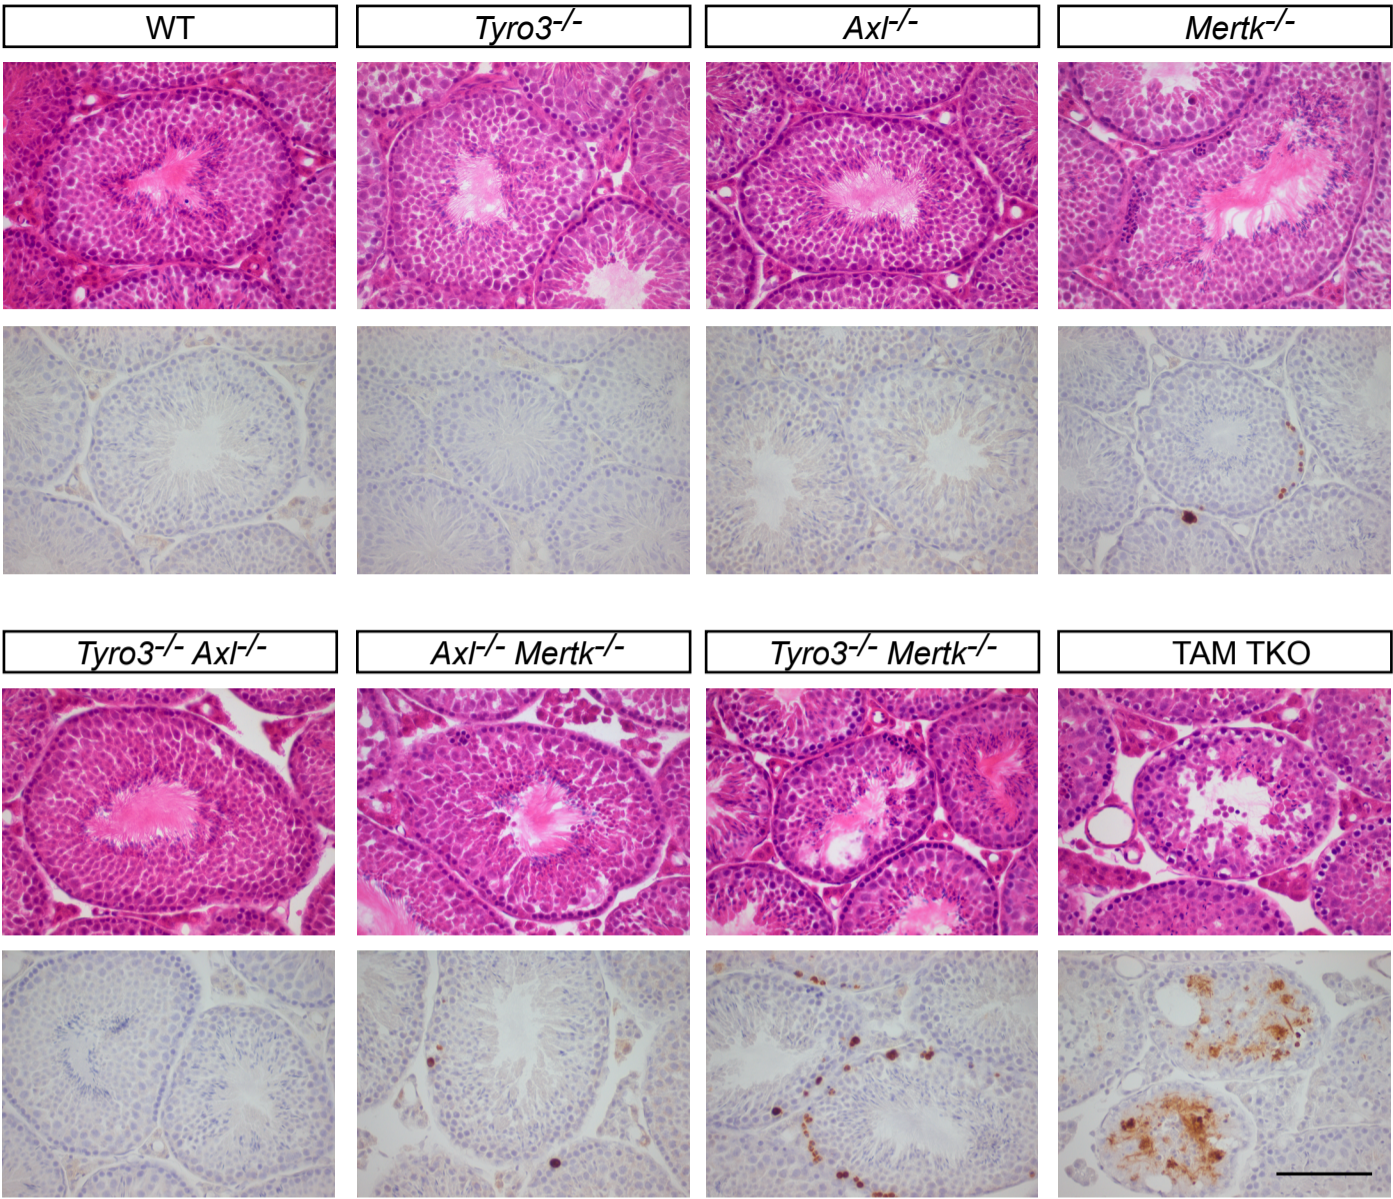

B

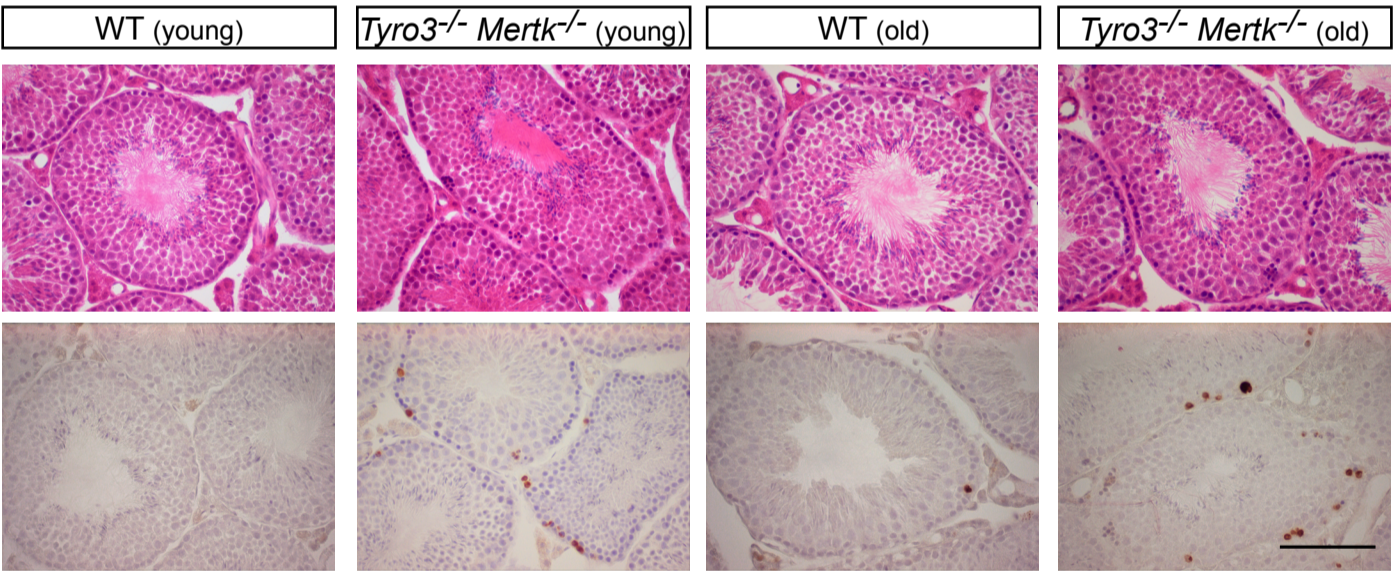

C

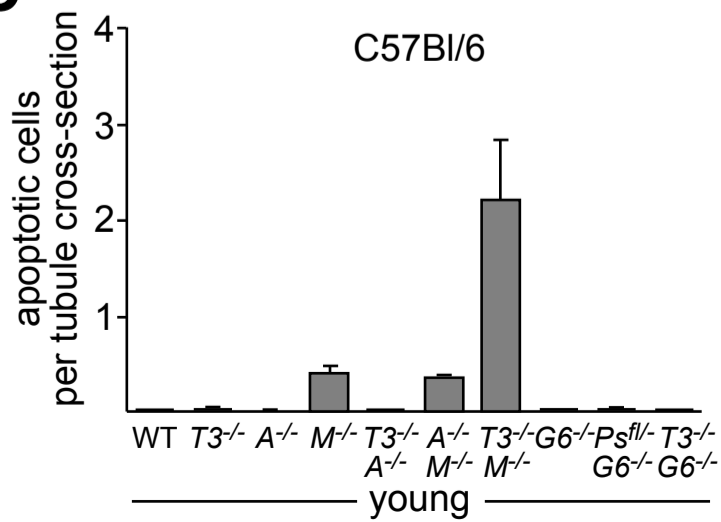

D

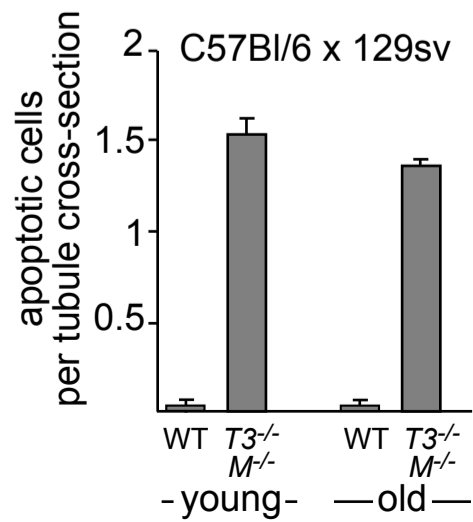

Supplement: supp [file elife_poa_e03385_Figure_8_figure_supplement_1.pdf › elife_poa_e03385_Figure_8_figure_supplement_1.pdf]
